# Supplementary material for: Co3X8 (X = Cl and Br): multiple phases and magnetic properties of the Kagome lattice
Source: Royal Society of Chemistry journal article supplement (doi:10.1039/d3nr04762h), 2023-12-05
Supplement: d3nr04762h1.pdf [file d3nr04762h1.pdf]

## Supporting information:

### **Co<sub>3</sub>X<sub>8</sub> (X = Cl and Br): multiple phase and magnetic properties in Kagome lattice**

*Haoyun Bai<sup>1</sup>, Zhichao Yu<sup>1</sup>, Jinxian Feng<sup>1</sup>, Di Liu<sup>1</sup>, Weiqi Li<sup>2</sup> and Hui Pan<sup>1,3\*</sup>*

<sup>1</sup> Institute of Applied Physics and Materials Engineering, University of Macau, Macao SAR, 999078, P.R. China

<sup>2</sup> School of Physics, Harbin Institute of Technology, Harbin 150001, P.R. China

<sup>3</sup> Department of Physics and Chemistry, Faculty of Science and Technology, University of Macau, Macao SAR, 999078, P. R. China

\*Corresponding Author

H. Pan: [huipan@um.edu.mo](mailto:huipan@um.edu.mo) (email), +853 88224427 (tel.), +853-88222454 (fax)

## **Supplementary note**

### **1. Confirmation of lattice constants of Co<sub>3</sub>X<sub>8</sub> (X = Cl and Br)**

To get the stable structures of 12- and 156-Co<sub>3</sub>X<sub>8</sub>, the full optimizations were firstly carried out. We find that the optimized structure exhibits spontaneous symmetry breaking, which results in different lattice constants ( $a \neq b$ ) and changed lattice angle ( $\theta \neq 120^\circ$ ). Moreover, the magnetic properties of Co<sub>3</sub>X<sub>8</sub> are complex during the structure optimization, as the magnetic ground state changes when the lattice changes (Table S4). Thus, we changed the lattice to a hexagonal lattice and redo the optimization. After multiple optimizations, we obtain the energy-optimized lattice constant.

To confirm whether the obtained lattice constants are accurate, the strain-energy fitting was performed. According to the Born-Huang criteria, the strain energy density of 2D material under biaxial strain fits a second-order relationship with strain, that is,

$$U(\varepsilon) = \frac{1}{2}C_{11}\varepsilon^2$$

$$U(a) = U(a_0) + U(\varepsilon)$$

where  $U(\varepsilon)$  is the energy change after applying strain,  $U(a)$  is the total energy when lattice constant is  $a$ ,  $C_{11}$  is the elastic constant, and  $\varepsilon$  is biaxial strain, which is defined as

$$\varepsilon = (a - a_0)/a_0$$

where  $a$  is lattice constant under strain, and  $a_0$  is the lattice constant in equilibrium. Thus,  $U(a)$  and  $a$  has a second-order relationship:

$$U(a) = Aa^2 + Ba + C$$

Then, we can obtain the lattice constant in equilibrium:

$$a_0 = \frac{B}{2A}$$

To simulate biaxial strain, a series of lattice constants were set, and lattice-fixed optimization were performed to obtain the stable structure, and the energy of magnetic ground states were used for energy-strain fitting (Figure S2-3). To improve accuracy, we removed points that are not on the fitted curves clearly. The fitting results show that the lattice constants obtained by the multiple optimizations are accurate enough. For example, the lattice constant of 12- $\text{Co}_3\text{Br}_8$  is 7.302 Å by DFT, and 7.33 Å by fitting. The error is only 0.36%. Furthermore, we also showed that a weak strain has little effect on the magnetic and electronic properties of  $\text{Co}_3\text{X}_8$ . Thus, the optimized lattice constants were used in the study.

## 2. The label of different magnetic arrangements

To determine the magnetic ground states of  $\text{Co}_3\text{X}_8$  ( $\text{X} = \text{Cl}$  and  $\text{Br}$ ), ten kinds of magnetic arrangements are considered in total (as listed in Table S3 & Figure S8). However, some arrangements cannot exist, such as FM in 12- $\text{Co}_3\text{X}_8$ . We marked the final states of these arrangements in Table S3. For the FM state in 156- $\text{Co}_3\text{X}_8$  and 12- $\text{Co}_3\text{X}_8$  under strain ( $\varepsilon < -6\%$ ), three Co ions have different magnetic moments, which is different from the magnetic moments in ferromagnetic structures. Specially, the optimized magnetic properties of AFM1, AFM3, and AFM5 arrangements of 12- $\text{Co}_3\text{X}_8$  are actually not antiferromagnetic arrangement, as Co2 shows very weak or no magnetic moments (Figure S9), which is different from the definition of AFM. As the total magnetic moments of them are zero, here we still use the original label to refer to their optimized result. For the AFM2 state, the magnetic arrangement changed into a unregular FIM state after the optimization, where two of twelve Co atoms are spin-up only, resulting in a total magnetic moment of  $\sim 6 \mu_B$  (Table S3 & Figure S9).

## Supporting Tables

Table S1. The lattice parameters (a), thickness (t), total energy ( $E_0$ ), and formation energy ( $E_f$ ) of  $\text{Co}_3\text{X}_8$  (X = Cl and Br).

| SG  |                          | lattice (Å) |       | $E_0$ (eV) | $E_f$<br>(eV/unitcell) | $E_f$<br>(eV/atom) |
|-----|--------------------------|-------------|-------|------------|------------------------|--------------------|
|     |                          | a           | t     |            |                        |                    |
| 164 | $\text{Co}_3\text{Cl}_8$ | 6.755       | 2.544 | -41.421    | -5.635                 | -0.512             |
|     | $\text{Co}_3\text{Br}_8$ | 7.148       | 2.682 | -37.154    | -2.987                 | -0.271             |
|     | $\text{Co}_3\text{I}_8$  | 7.725       | 2.928 | -33.487    | -0.241                 | -0.022             |
| 156 | $\text{Co}_3\text{Cl}_8$ | 6.769       | 2.500 | -41.428    | -5.642                 | -0.513             |
|     | $\text{Co}_3\text{Br}_8$ | 7.199       | 2.663 | -37.160    | -2.993                 | -0.272             |
|     | $\text{Co}_3\text{I}_8$  | 7.710       | 2.930 | -33.492    | -0.246                 | -0.022             |
| 12  | $\text{Co}_3\text{Cl}_8$ | 6.888       | 2.500 | -41.593    | -5.807                 | -0.528             |
|     | $\text{Co}_3\text{Br}_8$ | 7.302       | 3.066 | -37.279    | -3.112                 | -0.282             |
|     | $\text{Co}_3\text{I}_8$  | 7.721       | 2.931 | -33.496    | -0.250                 | -0.023             |

Table S2. The calculated elastic constants of 12- and 156- $\text{Co}_3\text{X}_8$  (X = Cl and Br). Unit: (GPa).

|                          | SG  | $C_{11}$ | $C_{22}$ | $C_{12}$ | $C_{44}$ |
|--------------------------|-----|----------|----------|----------|----------|
| $\text{Co}_3\text{Cl}_8$ | 156 | 31.934   | 31.934   | 9.291    | 11.322   |
|                          | 12  | 25.051   | 22.661   | 6.846    | 8.308    |
| $\text{Co}_3\text{Br}_8$ | 156 | 32.257   | 32.257   | 9.378    | 11.441   |
|                          | 12  | 22.651   | 21.074   | 5.693    | 7.401    |

Table S3. The total energy ( $E_0$ ), energy difference between ground state ( $\Delta E$ ) and magnetic moment (magmom) for different magnetic configurations in a supercell. The magnetic states in “magmom” indicates the final magnetic configuration is changed into different configurations.

| 156- $\text{Co}_3\text{X}_8$ |                          |                  |                    |                          |                  |                    |
|------------------------------|--------------------------|------------------|--------------------|--------------------------|------------------|--------------------|
|                              | $\text{Co}_3\text{Cl}_8$ |                  |                    | $\text{Co}_3\text{Br}_8$ |                  |                    |
|                              | $E_0$ (eV)               | $\Delta E$ (meV) | magmom ( $\mu_B$ ) | $E_0$ (eV)               | $\Delta E$ (meV) | magmom ( $\mu_B$ ) |
| FM                           | -165.70                  | 27.47            | 4                  | -148.62                  | 33.5             | 4.0002             |
| FIM                          | -165.73                  | 0                | 1.2439             | -148.66                  | 0                | 1.211              |
| NM                           | -165.35                  | 375.45           | 0                  | -148.32                  | 337.02           | 0                  |
| AFM1                         | -165.62                  | 106.48           | 0                  | -148.55                  | 109.72           | 0.0001             |
| AFM2                         | -164.93                  | 800.03           | 0                  | -148.59                  | 66.15            | 0                  |
| AFM3                         | -165.57                  | 158.00           | 0                  | -148.50                  | 155.85           | 0                  |
| AFM4                         | -165.69                  | 35.86            | -0.0022            | -148.62                  | 37.29            | 0.0643             |
| AMF5                         | -165.65                  | 78.43            | -0.0179            | -148.52                  | 132.7            | 0.0007             |
| FIM-like                     | -165.65                  | 75.89            | 0                  | -148.59                  | 64.51            | 0                  |

| 2_only                            | AFM-like                        |          |                    | AFM-like                        |          |                    |
|-----------------------------------|---------------------------------|----------|--------------------|---------------------------------|----------|--------------------|
| 12-Co <sub>3</sub> X <sub>8</sub> |                                 |          |                    |                                 |          |                    |
|                                   | Co <sub>3</sub> Cl <sub>8</sub> |          |                    | Co <sub>3</sub> Br <sub>8</sub> |          |                    |
|                                   | E <sub>0</sub> (eV)             | ΔE (meV) | magmom ( $\mu_B$ ) | E <sub>0</sub> (eV)             | ΔE (meV) | magmom ( $\mu_B$ ) |
| FM                                | FIM                             |          |                    | FIM                             |          |                    |
| FIM                               | -166.31                         | 67.05    | 12.000             | -148.96                         | 159.96   | 11.998             |
| NM                                | -164.15                         | 2224.47  | 0.001              | -147.12                         | 2004.43  | 0.000              |
| AFM1                              | -166.34                         | 42.32    | 0.000              | -149.01                         | 104.72   | 0.000              |
| AFM2                              | -166.34                         | 33.85    | 5.7368             | -149.01                         | 108.02   | 5.841              |
| AFM3                              | -166.27                         | 106.38   | 0.000              | -148.87                         | 248.26   | 0.000              |
| AFM4                              | AFM-like                        |          |                    | AFM-like                        |          |                    |
| AMF5                              | -166.37                         | 2.42     | 0.000              | -149.02                         | 103.82   | 0.000              |
| FIM-like                          | -166.37                         | 0.00     | 0.000              | -149.12                         | 0.00     | 0.000              |
| 2_only                            | FIM                             |          |                    | NM                              |          |                    |

Table S4. The energy (eV)-lattice parameter (a) data of AFM-like, FIM FM states when applying biaxial strain on Co<sub>3</sub>X<sub>8</sub> (X = Cl and Br), and d<sub>1</sub>/d<sub>2</sub> in 12-Co<sub>3</sub>X<sub>8</sub>. The data in bracket is the energy of FIM-5 state.

| a (Å)        | 12-Co <sub>3</sub> Cl <sub>8</sub> |          |         |                    | 156-Co <sub>3</sub> Cl <sub>8</sub> |         |         |
|--------------|------------------------------------|----------|---------|--------------------|-------------------------------------|---------|---------|
|              | d <sub>1</sub> /d <sub>2</sub>     | FIM-like | FIM     | FM                 | FIM-like                            | FIM     | FM      |
| <b>6.500</b> | 0.975                              | -41.187  | -41.191 | -41.188            | -41.176                             | -41.174 | -41.186 |
| <b>6.550</b> | 0.974                              | -41.273  | -41.277 | -41.270            | -41.261                             | -41.274 | -41.271 |
| <b>6.600</b> | 0.913                              | -41.307  | -41.312 | FIM                | -41.326                             | -41.340 | -41.335 |
| <b>6.650</b> | 0.896                              | -41.404  | -41.389 | FIM                | -41.373                             | -41.387 | -41.382 |
| <b>6.700</b> | 0.889                              | -41.472  | -41.454 | FIM                | -41.401                             | -41.416 | -41.410 |
| <b>6.800</b> | 0.880                              | -41.559  | -41.541 | FIM                | -41.407                             | -41.424 | -41.417 |
| <b>6.900</b> | 0.873                              | -41.596  | -41.579 | FIM                | -41.355                             | -41.373 | -41.367 |
| <b>7.000</b> | 0.865                              | -41.584  | -41.567 | FIM                | -41.245                             | -41.269 | -41.260 |
| <b>7.050</b> | 0.857                              | -41.561  | -41.545 | FIM                | -41.225                             | -41.214 | -41.186 |
| <b>7.100</b> | 0.852                              | -41.529  | -41.512 | FIM                | -41.181                             | -41.171 | -41.133 |
| <b>7.150</b> | 0.848                              | -41.487  | -41.471 | FIM                | -41.130                             | -41.140 | -41.069 |
| <b>7.200</b> | 0.864                              | -41.413  | -41.300 | FIM-5<br>(-41.286) | -41.056                             | -41.128 | -41.003 |
| <b>7.250</b> | 0.857                              | -41.363  | -41.244 | FIM-5<br>(-41.237) |                                     |         |         |
| <b>7.300</b> | 0.851                              | -41.304  | -41.154 | FIM-5<br>(-41.179) | -40.883                             | -41.023 | -40.876 |
| a (Å)        | 12-Co <sub>3</sub> Br <sub>8</sub> |          |         |                    | 156-Co <sub>3</sub> Br <sub>8</sub> |         |         |
|              | d <sub>1</sub> /d <sub>2</sub>     | FIM-like | FIM     | FM                 | FIM-like                            | FIM     | FM      |

|              |       |         |           |         |         |         |         |
|--------------|-------|---------|-----------|---------|---------|---------|---------|
| <b>6.700</b> | 1.023 | -36.357 | -36.384   | -36.383 | -36.375 | -36.380 | -36.383 |
| <b>6.750</b> | 1.005 | -36.537 | -36.546   | -36.534 | -36.539 | -36.544 | -36.545 |
| <b>6.800</b> | 1.006 | -36.678 | -36.687   | -36.686 | -36.682 | -36.688 | -36.687 |
| <b>7.000</b> | 0.978 | -37.062 | -37.064   | FIM     | -37.053 | -37.062 | -37.055 |
| <b>7.050</b> | 0.980 | -37.108 | -37.110   | FIM     |         | □       |         |
| <b>7.100</b> | 0.905 | -37.168 | -37.138   | FIM     | -37.134 | -37.145 | -37.137 |
| <b>7.250</b> | 0.890 | -37.268 | -37.230   | FIM     | -37.133 | -37.146 | -37.138 |
| <b>7.350</b> | 0.882 | -37.279 | -37.236   | FIM     | -37.064 | -37.080 | -37.072 |
| <b>7.400</b> | 0.880 | -37.268 | -37.224   | FIM     | -37.012 | -37.028 | -37.019 |
| <b>7.600</b> | 0.864 | -37.141 | -37.094   | FIM     | -36.828 | -36.906 | -36.779 |
| <b>7.650</b> | 0.849 | -37.089 | -37.043   | FIM     |         |         |         |
| <b>7.700</b> | 0.871 | -37.018 | -36.889   | FIM-5   |         |         |         |
|              |       |         | (-36.927) |         |         |         |         |
| <b>7.800</b> | 0.853 | -36.898 | -36.761   | FIM-5   | -36.534 | -36.681 | -36.522 |
|              |       |         | (-36.807) |         |         |         |         |

## Supporting Figures

### Structure, energy fitting and stability

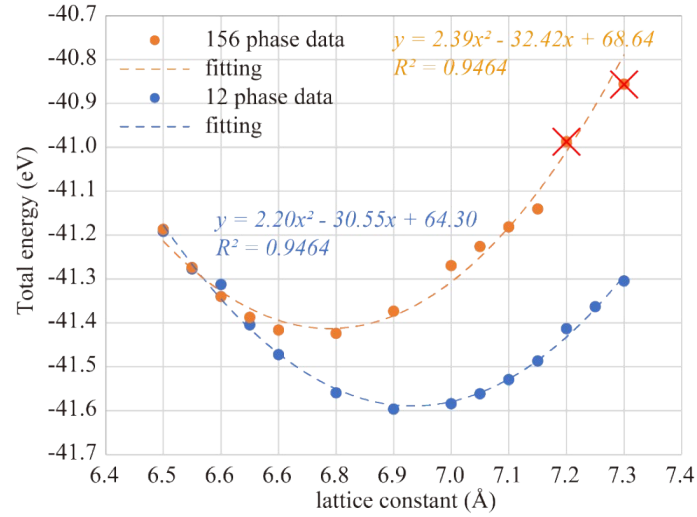

Figure S1. The strain-energy fitting of Co<sub>3</sub>Cl<sub>8</sub>. The points marked with a red cross were not used for fitting.

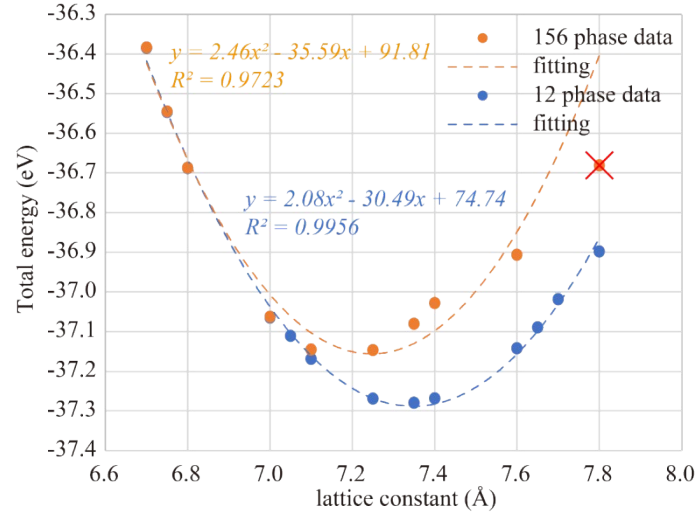

Figure S2. The strain-energy fitting of  $\text{Co}_3\text{Br}_8$ . The points marked with a red cross were not used for fitting.

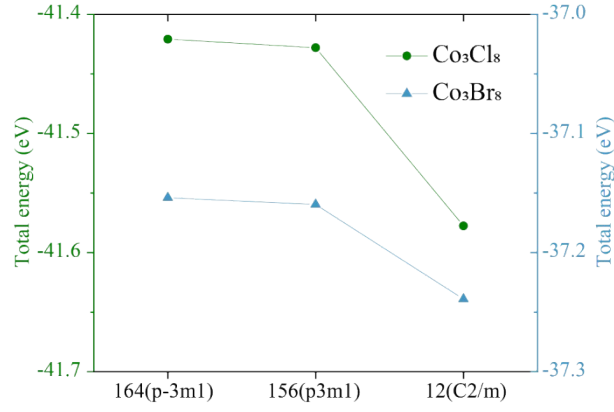

Figure S3. The total energies of  $\text{Co}_3\text{X}_8$  with different phases.

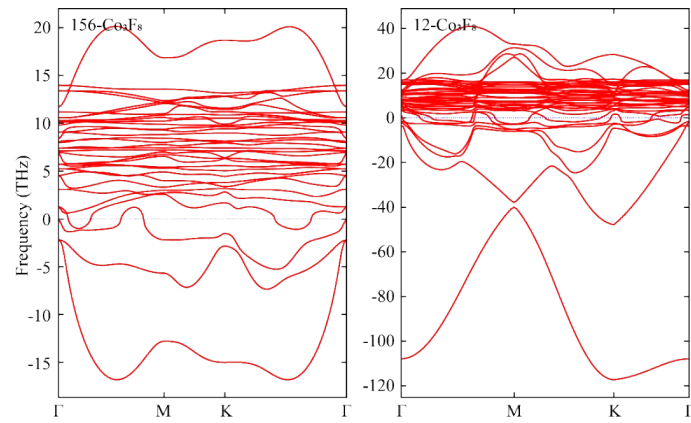

Figure S4. The phonon spectra of  $156\text{-Co}_3\text{F}_8$ .

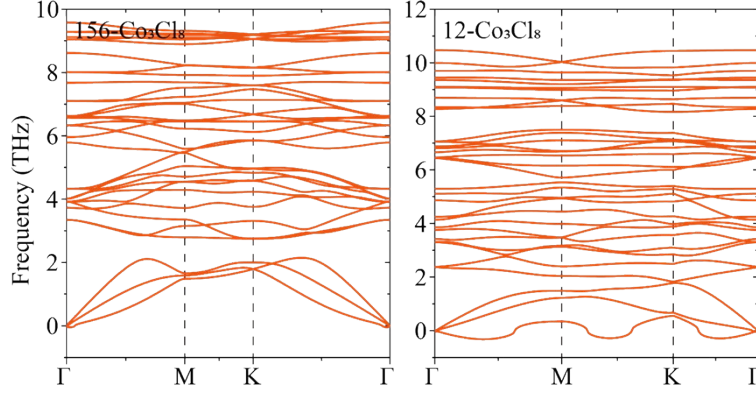

Figure S5. The phonon spectra of  $\text{Co}_3\text{Cl}_8$ .

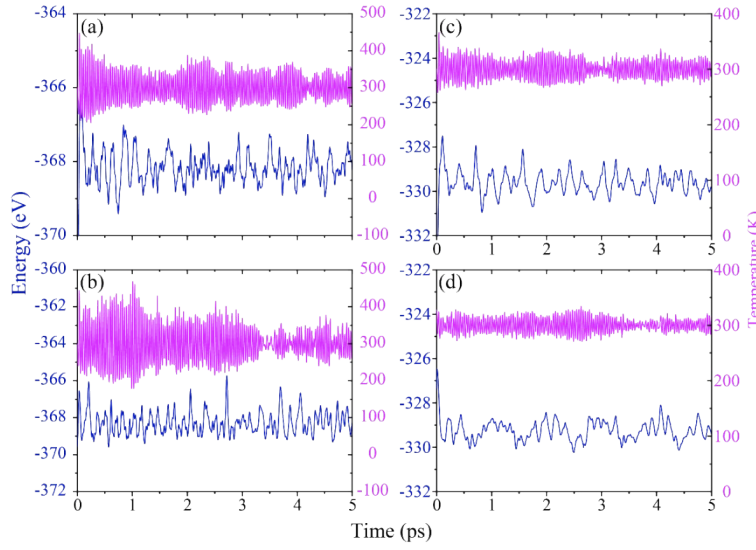

Figure S6. The AIMD simulations of (a) 156- $\text{Co}_3\text{Cl}_8$ , (b) 12- $\text{Co}_3\text{Cl}_8$ , (c) 156- $\text{Co}_3\text{Br}_8$  and (d) 12- $\text{Co}_3\text{Br}_8$ .

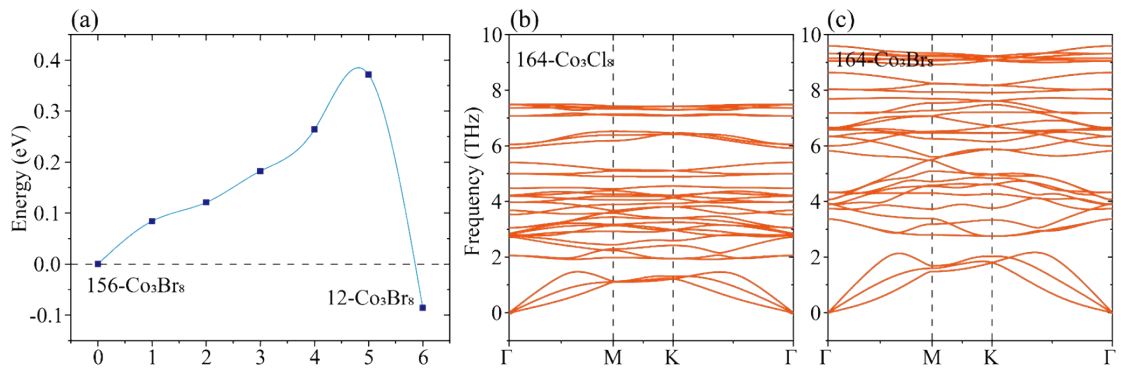

Figure S7. (a) The energy diagrams for the phase change from 156- to 12- $\text{Co}_3\text{Br}_8$ . The phonon spectra of (b) 164- $\text{Co}_3\text{Cl}_8$  and 164- $\text{Co}_3\text{Br}_8$ .

## Magnetic properties

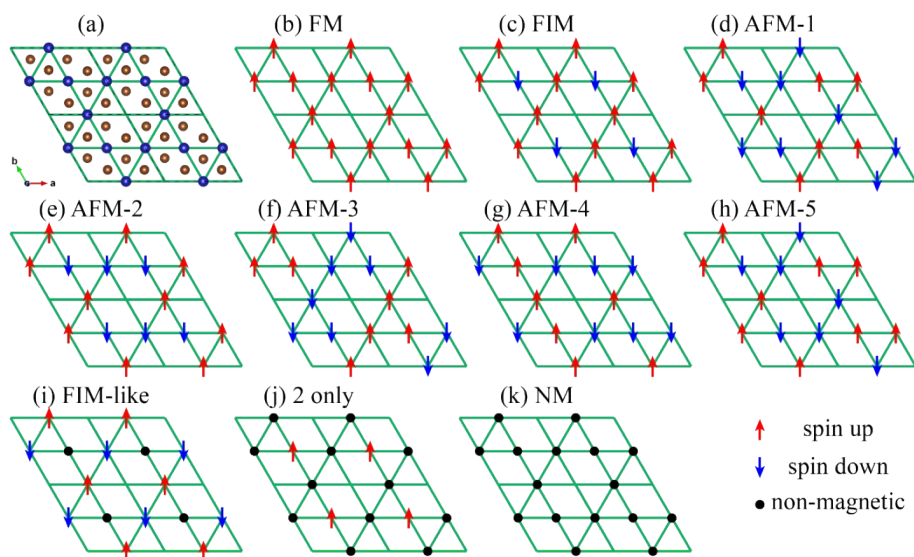

Figure S8. Magnetic configurations of 156- and 12- $\text{Co}_3\text{X}_8$  tested in the DFT calculation.

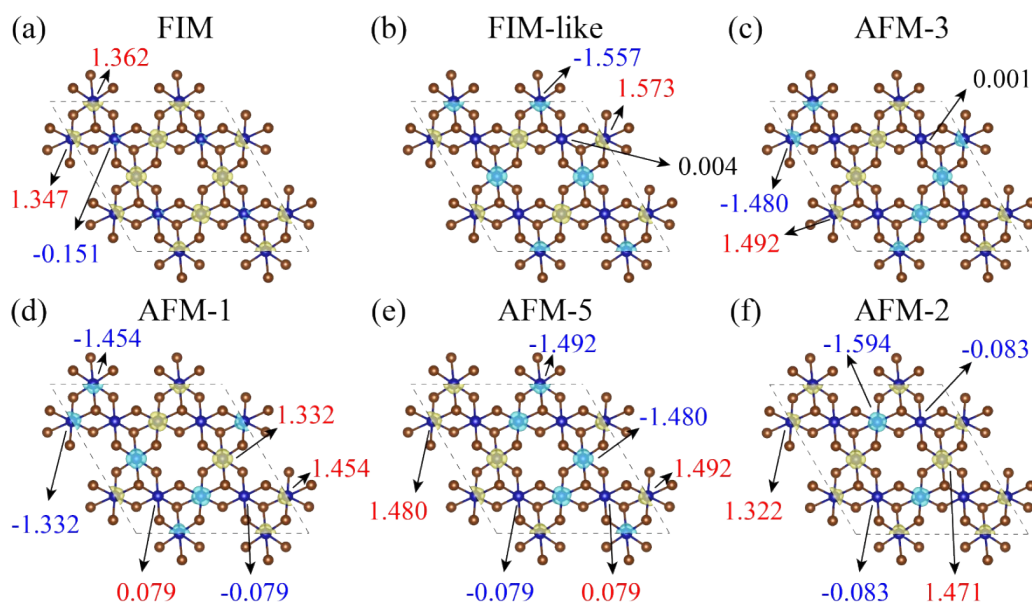

Figure S9. Spin density and magnetic moments of (a) FIM, (b) AFM-like, (c) AFM3, (d) AFM1, (e) AFM5, and (f) AFM2 12- $\text{Co}_3\text{Br}_8$ . The yellow and cyan denotes spin-up and spin-down, respectively. The isosurface is  $0.02 \text{ e}/\text{\AA}^3$ . The magnetic moments of some ions are marked.

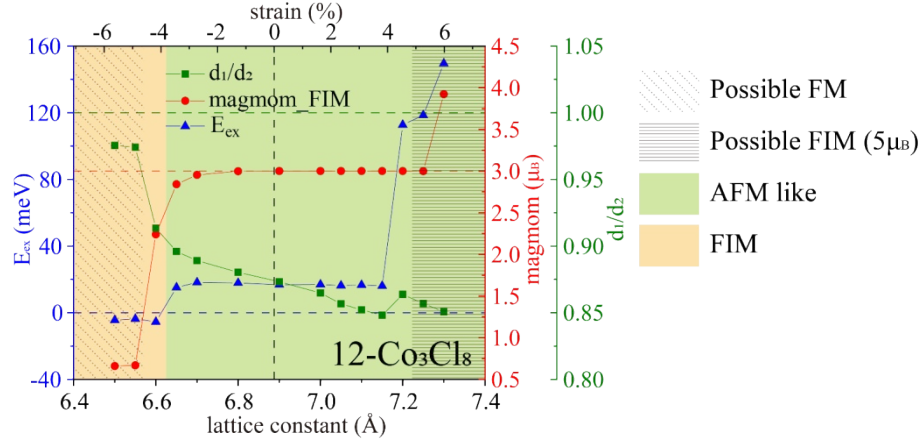

Figure S10. Strain-dependent magnetic properties of 12-Co<sub>3</sub>Cl<sub>8</sub>.  $E_{\text{ex}}$  is defined as  $E_{\text{ex}} = E_{\text{FIM}} - E_{\text{FIM-like}}$ .

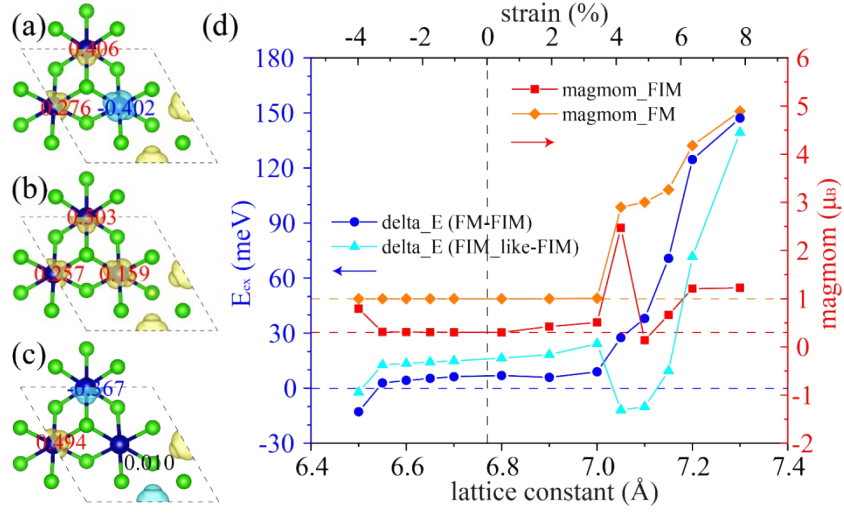

Figure S11. The spin density of (a) FIM, (b) FM, and (c) FIM-like 156-Co<sub>3</sub>Cl<sub>8</sub>. The numbers are the magnetic moments. (d) Strain-dependent magnetic properties of 156-Co<sub>3</sub>Cl<sub>8</sub>.

## Electronic properties

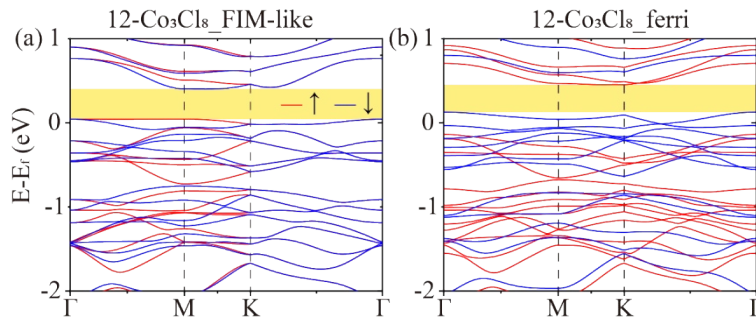

Figure S12. The band structures of 12-Co<sub>3</sub>Cl<sub>8</sub>.

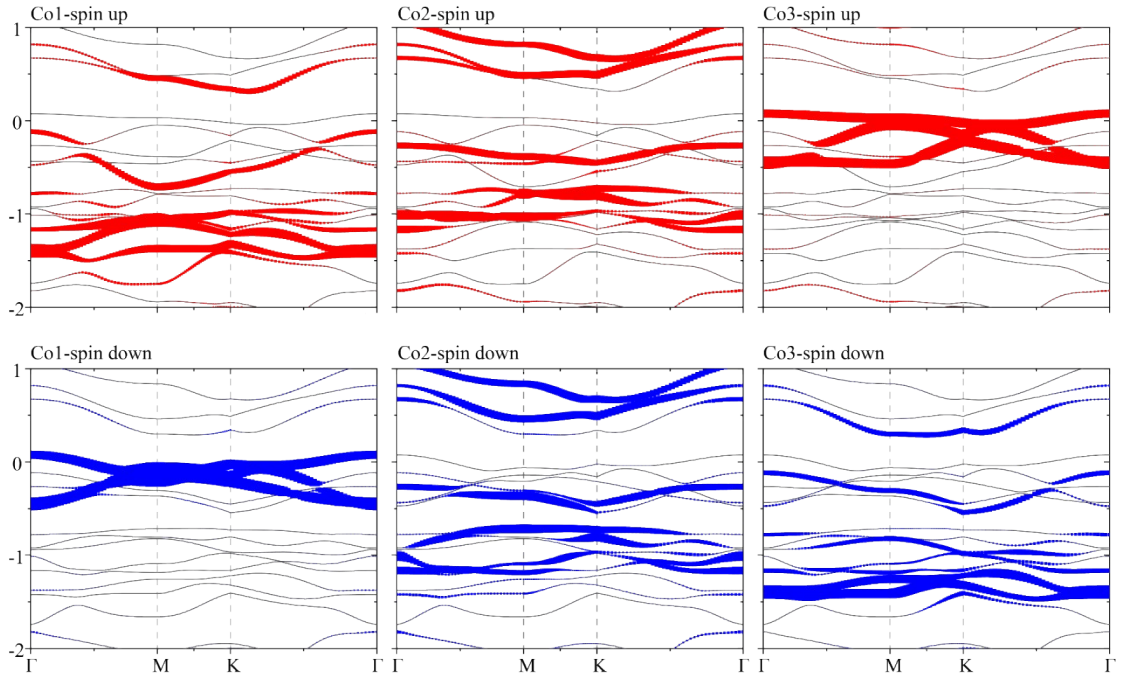

Figure S13. The pbands of Co1, Co2, and Co3 in 12-Co<sub>3</sub>Br<sub>8</sub>.

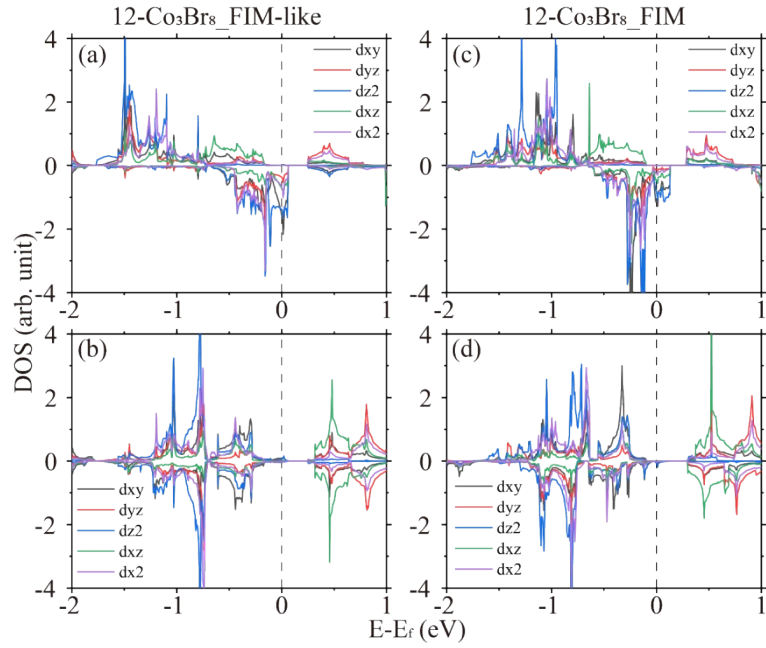

Figure S14. The PDOSs for 12-Co<sub>3</sub>Br<sub>8</sub>: (a) Co1 and (b) Co2 in the FIM-like state, and (c) Co1 and (d) Co2 in the FIM state.

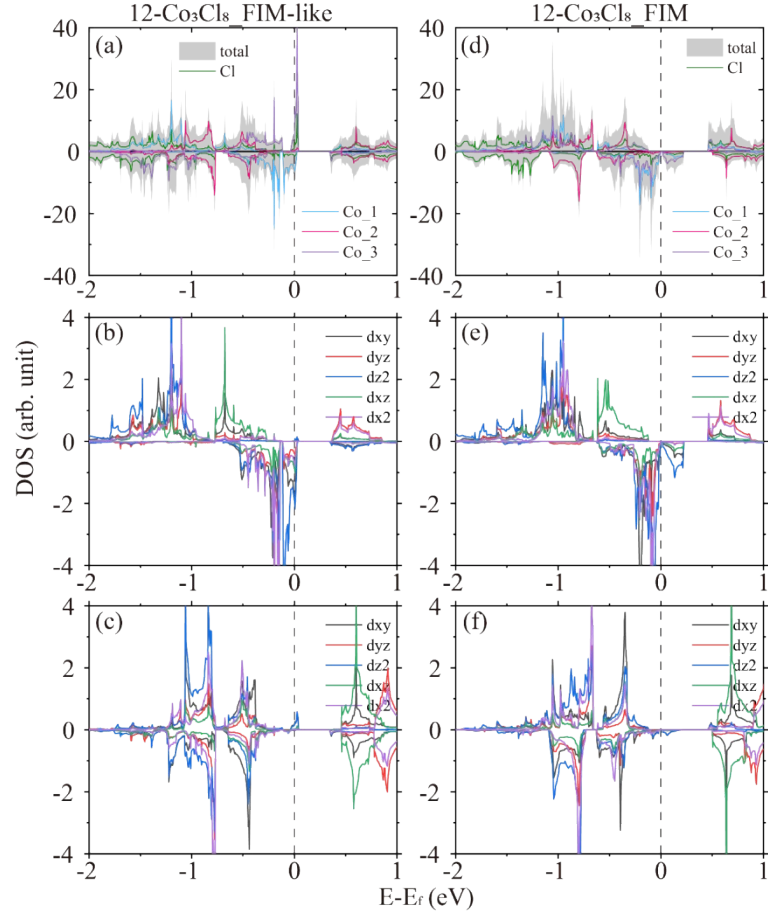

Figure S15. The PDOSs for 12- $\text{Co}_3\text{Cl}_8$ : (a) elements, (b) Co1 and (c) Co2 in the FIM-like state, and (d) elements, (e) Co1 and (f) Co2 in the FIM state.

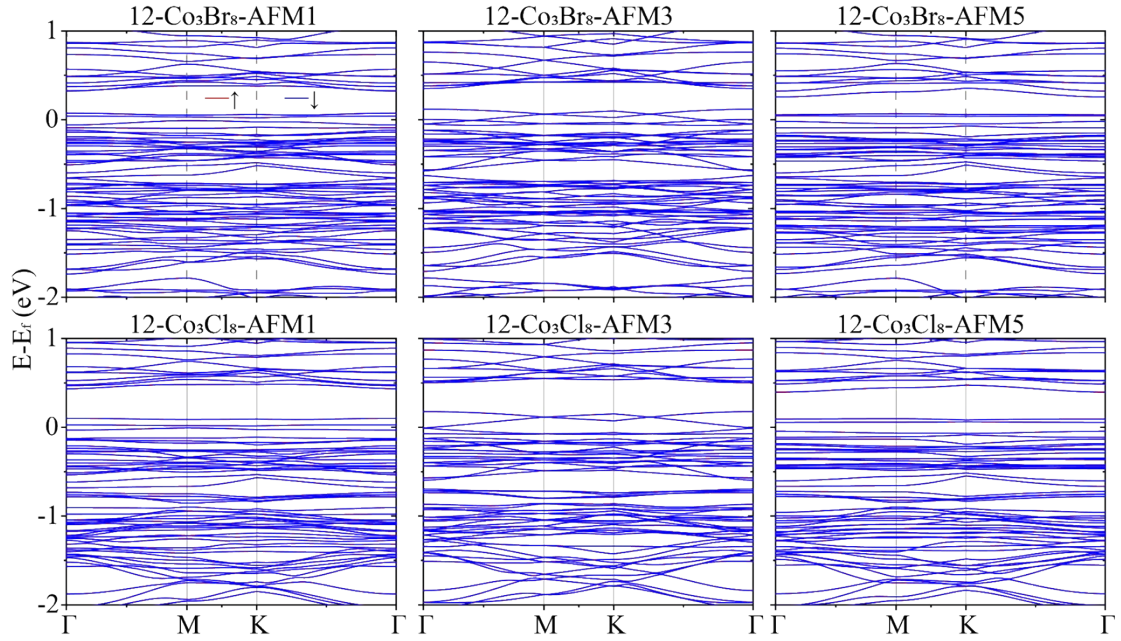

Figure S16. Band structures of AFM 12- $\text{Co}_3\text{X}_8$ .

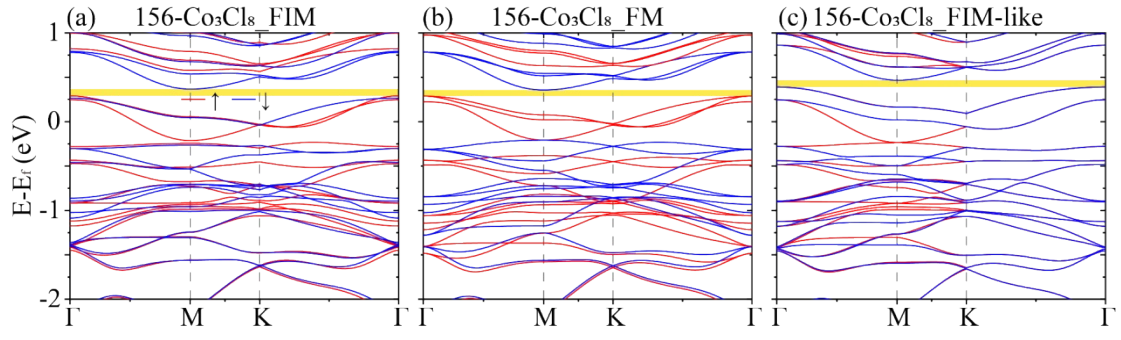

Figure S17. The band structures of (a) FIM, (b) FM and (c) FIM-like 156-Co<sub>3</sub>Cl<sub>8</sub>.

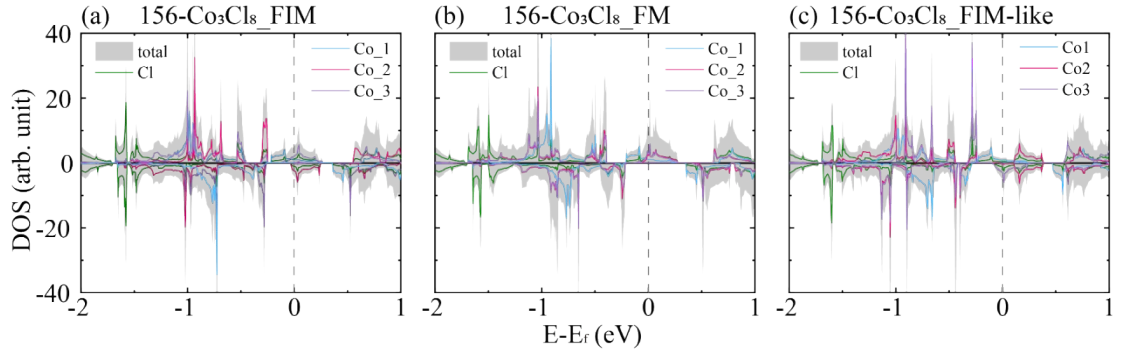

Figure S18. The PDOSs of (a) FIM, (b) FM and (c) FIM-like 156-Co<sub>3</sub>Cl<sub>8</sub>.

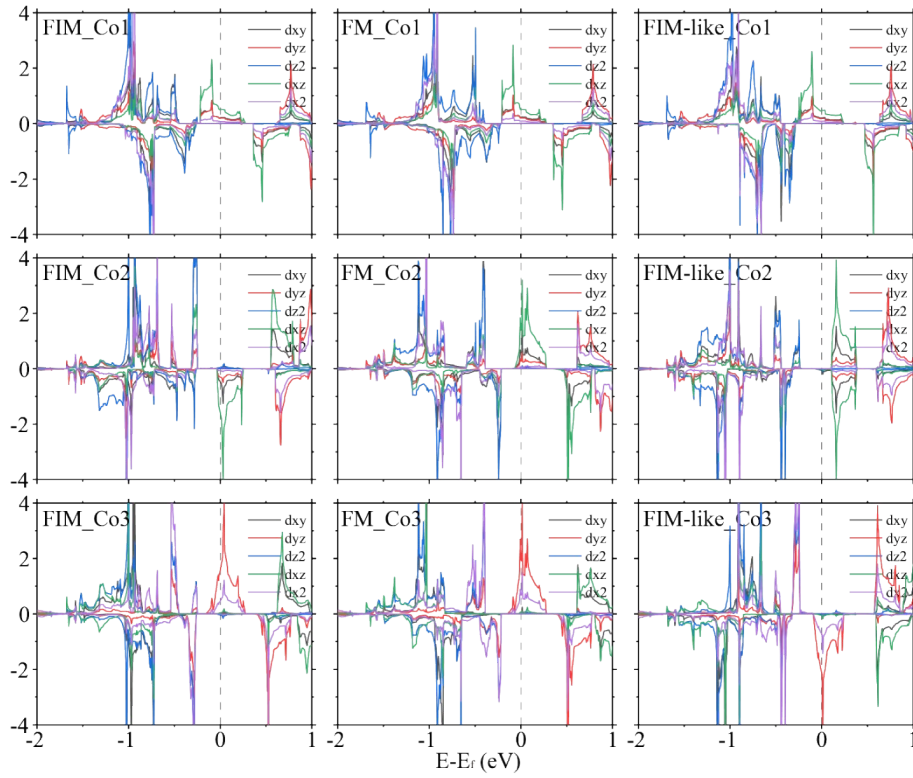

Figure S19. The PDOSs of three Co atoms in 156-Co<sub>3</sub>Cl<sub>8</sub> with different magnetic states.

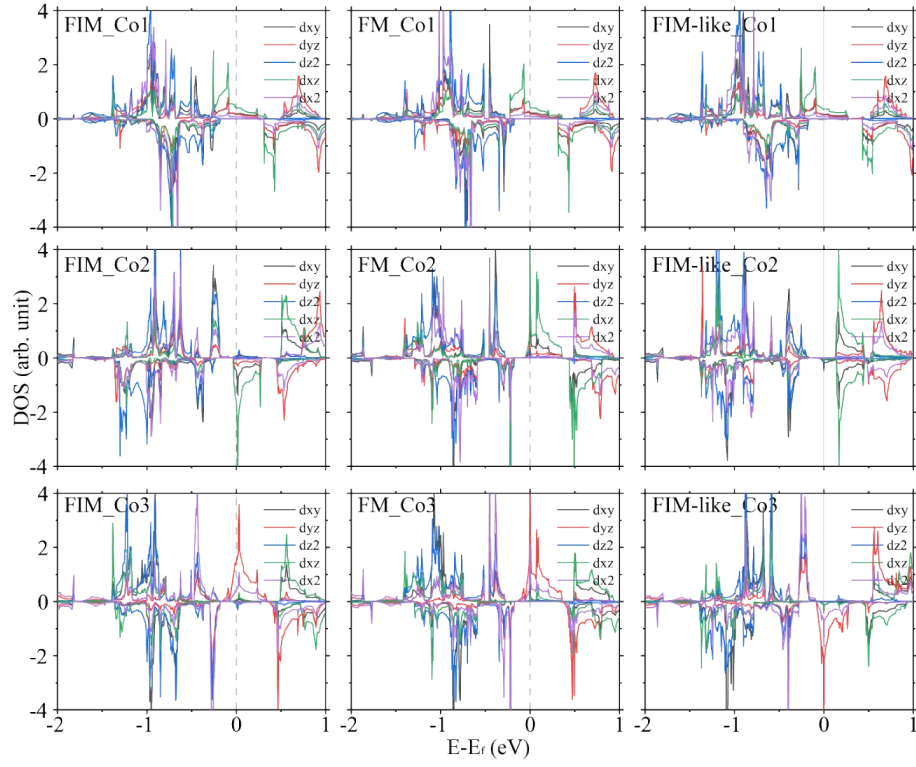

Figure S20. The PDOSs of three Co atoms in 156-Co<sub>3</sub>Br<sub>8</sub> with different magnetic states.

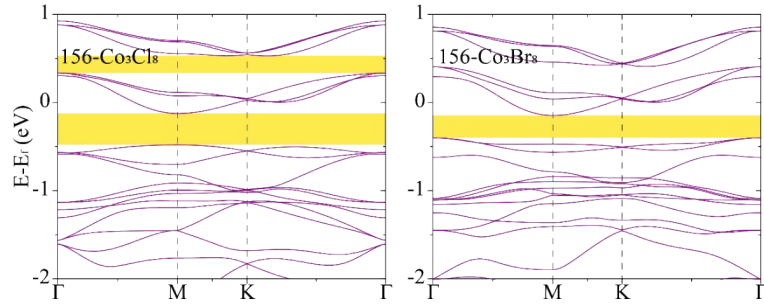

Figure S21. The band structures of 156-Co<sub>3</sub>X<sub>8</sub> without considering spin.

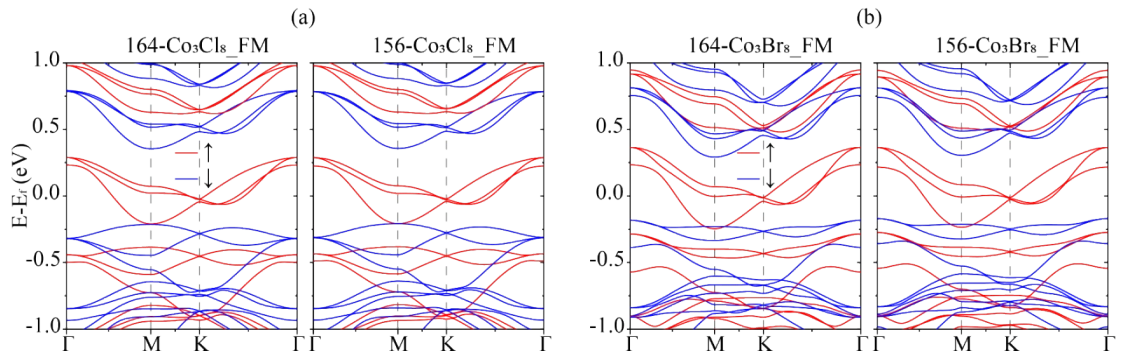

Figure S22. The comparison of band structures for 164- and 156-Co<sub>3</sub>X<sub>8</sub>.

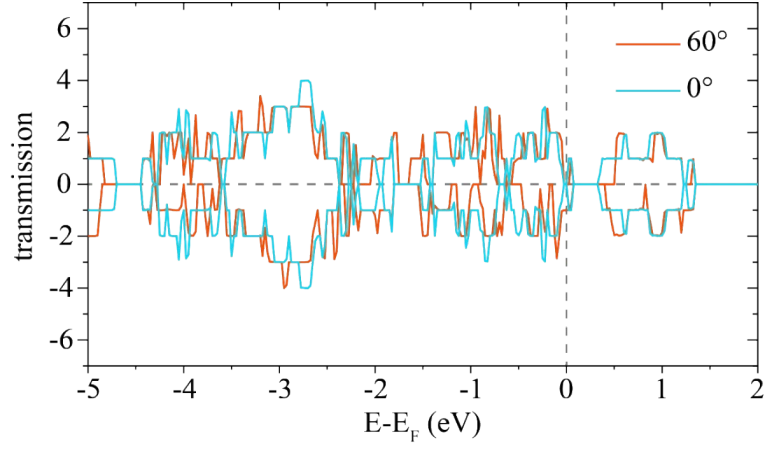

Figure S23. Spin-resolved transmission spectra of 12-Co<sub>3</sub>Br<sub>8</sub> under the 60° and 0° directions.

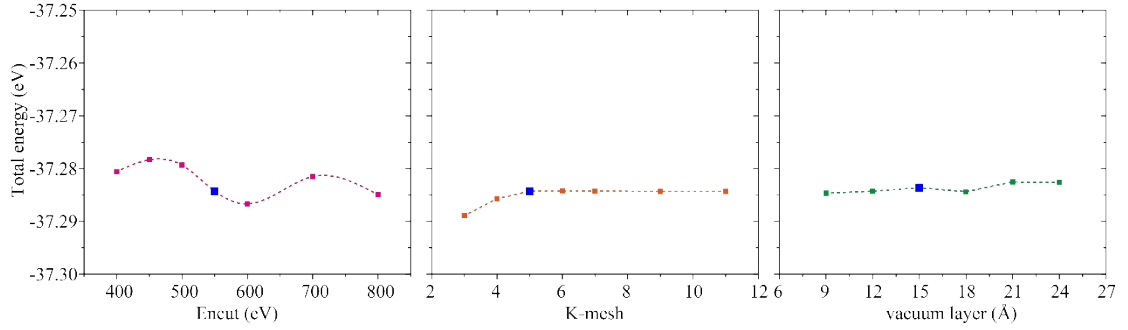

Figure S24. Convergence test for structure optimization. The total energy as a function of: (a) cut off energy, (b) K-mesh along  $xy$  plane, and (c) thickness of vacuum layer. The K-mesh in (a) and (c) are set as  $5 \times 5 \times 1$ , cut off energy in (b-c) are set as 550 eV, and vacuum layer in (a-b) are set as 15 Å. The condition used in our calculations is marked in blue blocks.
